# Supplementary material for: Genetic Dissection of Snow Mold Tolerance in US Pacific Northwest Winter Wheat Through Genome-Wide Association Study and Genomic Selection
Source: Front Plant Sci. 2019 Oct 29;10:1337. doi: 10.3389/fpls.2019.01337 (PMC6830427; doi:10.3389/fpls.2019.01337)
Supplement: Supplementary file 3 [file Table_2.xlsx]

## Sheet: Sheet1
Supplementary Table 2. BLUP scores for snow mold tolerance across all environments and corresponding allele for 10 SNP markers associated with snow mold tolerance in the Pacific Northwest winter wheat. Favorable alleles are highlighted.
Line	BLUPscore	Favorable allele
		A	G	C	T	A	T	G	A	C	A
		IWB79643	IWB3779	IWB59690	IWB54468	IWB8187	IWB77128	IWB36501	IWB50005	IWB75269	IWB76618	No. of favorable alleles
2004X112-7-0-2	-0.2026	G	G	A	T	A	T	A	G	T	G	4
2004X151-5-0-4	0.4708	G	G	A	T	A	T	A	G	C	G	5
5J030235-4	0.4708	G	G	C	T	A	C	A	A	T	A	6
5J030235-7	0.4708	G	G	A	T	A	T	G	A	T	G	6
5J030465-1	1.1443	GA	G	C	T	A	C	A	A	T	A	6
5J030662-13	-0.6836	G	A	A	T	G	CT	A	G	C	G	2
5J040094-1	0.6633	A	AG	A	C	A	T	AG	G	C	A	5
5J040150-1	0.08601	G	A	A	T	A	T	A	G	C	A	5
5J050278-4	0.08601	G	A	A	C	G	T	A	G	C	G	2
5J050278-6	0.6633	G	A	A	T	A	T	A	A	C	G	5
5J050348-2	0.08601	G	G	A	T	A	T	A	G	C	G	5
5J050348-3	-0.2988	G	A	A	T	A	T	A	G	C	G	4
5J050390-1	0.08601	G	A	A	T	G	T	A	G	C	A	4
5J050390-4	0.4708	G	A	A	T	G	CT	A	G	C	A	3
5J050409-2	-0.6836	G	A	A	C	A	T	A	G	C	G	3
5J061865-1	-0.2988	G	G	A	T	G	T	A	G	C	GA	4
5J061865-10	-0.1064	G	G	A	T	G	T	A	G	C	G	4
5J061865-11	0.4708	G	G	A	T	A	T	A	G	C	G	5
5J061865-4	-0.5874	G	G	A	T	G	T	A	G	C	G	4
5J061865-7	0.4708	G	G	A	T	A	T	A	G	C	G	5
5J061865-8	0.9519	G	G	A	T	G	T	A	G	C	A	5
5J061865-9	0.6633	G	G	A	T	A	T	A	G	C	G	5
5J061870-11	0.5671	G	G	A	CT	G	T	A	G	C	A	4
5J061870-12	-0.395	G	A	A	T	G	T	A	G	C	A	4
5J061870-7	-0.2026	G	G	A	T	G	T	A	G	C	A	5
5J062060-8	-0.01019	G	A	A	T	G	T	A	A	C	G	4
5J062064-6	0.08601	G	AG	A	T	G	T	A	G	C	G	3
5J062100-2	0.08601	G	G	A	T	G	T	A	G	C	A	5
5J062100-3	-0.2988	G	A	A	T	G	T	A	G	C	G	3
5J062100-4	-0.2988	G	G	A	T	G	T	A	G	C	A	5
5J062100-6	-0.2988	G	A	A	CT	G	T	A	G	C	A	3
5J062111-2	-0.01019	G	A	A	T	G	T	A	G	C	G	3
5J062167-2	0.1822	G	A	A	C	A	T	G	G	C	G	4
5J062174-3	-0.01019	G	A	A	T	A	T	A	G	C	G	4
5J062199-1	-0.01019	G	A	A	T	G	T	A	G	C	G	3
5J062215-6	-0.395	G	A	A	T	G	T	A	G	C	G	3
5J062217-3	-0.1064	A	G	A	C	G	T	A	G	C	G	4
5J062248-1	-0.1064	G	A	A	T	G	T	A	G	C	A	4
5J062268-1	-0.6836	A	A	A	C	G	T	A	A	C	G	4
6J020187-2	-0.8761	G	A	A	C	G	T	A	G	C	G	2
6J020210-1	0.5671	A	A	A	C	AG	T	A	G	C	A	4
6J020219-1	-0.395	G	A	A	C	A	T	A	G	C	G	3
6J020288-1	-0.1064	G	A	A	T	A	T	G	G	C	A	6
98X371-3C	-0.7799	G	G	A	C	G	T	A	G	T	G	2
98X402-1C	-0.4912	G	G	A	T	A	T	A	G	T	G	4
98X471-2C	-0.395	G	A	A	T	A	T	A	G	T	G	3
98X472-4C	-1.1647	G	A	A	C	A	T	A	G	T	G	2
A00103	-0.2988	G	G	A	T	A	T	G	A	T	G	6
A00122	0.1822	G	A	A	T	A	T	A	A	T	G	4
A00151	-0.4912	G	A	A	C	A	T	A	G	T	G	2
A00154	-0.01019	G	G	A	T	G	T	A	A	T	G	4
A00166	-0.395	G	A	C	T	A	T	A	G	T	G	4
A00181	0.08601	G	G	A	T	A	T	A	G	C	G	5
A00187	-0.2026	G	G	A	T	A	T	A	G	T	A	5
A00198	0.08601	G	A	C	C	A	T	A	G	T	G	3
A00212	-0.5874	G	AG	C	T	AG	T	A	G	T	G	3
A00228	-0.5874	G	A	AC	T	A	T	A	A	T	A	5
A00229	0.2784	G	G	C	T	A	T	A	A	C	G	7
A00248	-0.2026	G	A	C	T	A	T	A	A	T	G	5
A99105	-0.4912	G	G	AC	T	G	T	A	A	T	A	5
A99138	-0.01019	G	G	C	T	A	T	A	A	T	A	7
A99165	-0.9723	G	G	C	T	A	T	A	A	C	G	7
AMBER	0.2784	G	AG	C	C	AG	T	A	A	C	A	5
ARS00127	-0.4912	G	A	A	T	A	T	A	A	T	G	4
ARS00173	-0.01019	G	G	A	T	A	T	A	G	T	G	4
ARS00226	-0.2026	G	AG	A	T	G	T	A	A	TC	G	3
ARS00235	0.4708	G	G	C	T	A	T	A	G	T	GA	5
ARS00258	-0.1064	G	G	A	T	A	T	A	A	T	G	5
ARS010704-1L	-0.4912	G	A	A	T	G	T	A	G	C	G	3
ARS010719-4L	0.1822	G	A	A	T	A	T	A	G	T	G	3
ARS010746-2C	-0.2026	G	G	AC	T	A	T	A	GA	T	G	4
ARS010762-2C	0.2784	A	A	A	T	A	T	A	G	T	G	4
ARS010769-6C	0.5671	A	G	A	T	A	T	G	G	T	G	6
ARS010780-1L	0.8557	G	G	A	T	A	T	A	G	T	G	4
ARS010780-3C	0.1822	G	A	A	T	A	T	A	G	T	G	3
ARS960277L-R	-0.2988	A	A	A	C	G	T	A	A	C	G	4
ARS96105	-0.1064	A	G	A	T	A	T	A	G	C	G	6
ARS96158	0.1822	G	G	C	T	A	T	A	G	T	G	5
ARS96277	-0.1064	G	A	A	T	G	T	A	G	C	G	3
ARS970042-1C	0.08601	G	G	A	T	G	T	A	G	T	G	3
ARS970071-3C	0.08601	G	G	A	T	A	T	A	A	T	G	5
ARS970161-3L(Selbu)	0.6633	G	A	C	T	G	T	A	A	T	A	5
ARS970168-2C	0.08601	A	A	A	CT	G	T	A	A	C	A	5
ARS970170-2L	0.1822	A	A	A	C	A	T	A	A	C	G	5
ARS970184-1C	0.9519	A	G	A	T	A	T	G	G	T	G	6
ARS9702782	0.3867	G	A	A	T	A	T	A	G	T	A	4
ARS97173	0.7595	G	A	C	T	A	T	A	G	T	G	4
ARS97173-16	-0.2026	G	A	C	T	A	T	A	G	T	G	4
ARS97230-6C	0.6633	G	G	C	T	A	T	A	G	C	G	6
ARS98237	-0.2988	G	A	A	T	G	T	A	G	T	G	2
ARS98237-28	-0.9723	G	A	A	T	G	T	A	G	T	G	2
ARS98X402-1C	-0.01019	G	G	A	T	A	T	A	G	T	G	4
ARS990077-1C	0.2784	G	G	A	T	A	T	A	G	T	G	4
ARS99123	0.5671	G	G	C	T	A	T	A	A	T	A	7
ARS99137	0.5671	G	G	C	T	A	T	A	A	T	A	7
ARSC96059-1	-0.4912	G	A	A	T	A	T	A	G	C	G	4
ARSC96059-2	-0.395	G	A	A	T	A	T	A	G	C	G	4
BITTERROOT	0.9519	G	G	A	T	G	T	A	A	C	A	6
BRUEHL	1.1443	A	G	C	T	A	T	G	A	T	G	8
BRUNDAGE96	0.8557	G	A	AC	T	G	CT	A	G	TC	G	1
BRUNDAGECF	0.6633	G	AG	A	T	A	T	A	G	C	G	4
BRUNEAU	1.0481	A	G	A	T	A	CT	A	G	C	A	6
C960003	-0.395	G	G	A	T	A	T	AG	A	T	GA	5
C960097	-0.2988	G	G	A	T	A	T	A	A	C	G	6
CARA	0.4708	G	G	A	T	A	T	A	G	T	G	4
CHRYSTAL	0.8557	GA	G	A	T	A	T	A	A	T	G	5
CHUKAR	0.1822	G	G	A	T	A	T	A	G	T	G	4
CODA	0.2784	G	G	A	T	A	T	A	G	T	G	4
CONCEPT	0.3746	A	G	A	T	A	T	A	G	C	A	7
CRESCENT	0.4708	A	A	A	T	G	T	A	G	T	G	3
DUNE	0.3746	G	A	A	C	A	C	A	A	C	A	4
EDWIN	0.8557	A	G	C	T	A	C	A	G	C	A	7
ELTAN	0.7595	A	G	A	C	A	T	G	A	C	A	8
F/E-39	0.3746	A	A	A	C	G	T	A	A	C	G	4
F/E-4	0.4708	A	A	A	C	G	T	A	A	C	GA	4
FINCH	-0.01019	A	A	A	C	G	T	A	A	C	G	4
GOETZE	-1.3571	G	G	A	T	A	CT	A	A	C	G	5
HILLER	0.08601	G	G	C	T	A	T	G	A	T	G	7
ID00-475-2DH	-0.1064	A	G	A	T	A	T	A	A	C	A	8
ID581	-1.2609	G	A	A	C	G	T	A	A	C	GA	3
ID587CF	-0.7799	G	A	A	C	G	C	A	G	C	G	1
ID589	0.08601	G	A	A	T	A	CT	A	G	C	GA	3
ID654	-0.9723	G	A	A	C	G	C	A	G	C	G	1
ID655	0.08601	G	A	A	C	AG	C	A	G	C	G	1
ID663	-0.8761	G	A	A	C	G	CT	A	G	C	G	1
ID859	-0.2026	G	AG	A	T	A	T	A	G	C	G	4
ID96-16702A	1.0481	G	G	A	T	A	CT	A	A	C	A	6
ID99-419	0.1822	GA	AG	A	C	A	T	A	A	C	A	5
J010038-4	0.4708	G	G	A	T	A	T	A	A	C	A	7
J010039-1	0.5671	G	G	C	T	A	C	A	A	C	A	7
J010049-1	-0.01019	G	G	A	T	A	T	A	A	C	G	6
J010049-2	-0.1064	G	G	A	T	A	T	G	G	T	G	5
J01C0009-11	-0.395	G	A	A	T	G	CT	A	G	C	G	2
J950048-001	0.2784	G	A	A	T	G	T	A	G	T	A	3
J950052-001	1.4329	A	G	A	C	A	T	G	A	C	A	8
J950056-004	-0.2988	G	A	A	C	A	T	A	A	C	A	5
J950060-001	0.1822	A	A	A	C	G	T	A	G	C	GA	3
J950077-003	0.2784	G	AG	A	T	G	T	A	G	C	A	4
J950077-004	0.7595	G	A	A	C	G	T	A	A	C	G	3
J950081-001	0.2784	G	G	A	T	G	T	A	G	C	A	5
J950086-002	0.4708	G	AG	A	C	A	T	A	A	C	A	5
J950087-001	0.2784	G	A	A	C	A	T	A	G	C	GA	3
J950114-001	0.3746	G	AG	A	T	A	T	A	G	C	G	4
J950114-002	-0.01019	G	AG	A	T	G	T	A	G	C	G	3
J950274-001	0.08601	A	G	A	C	A	T	A	A	C	A	7
J950276-001	0.3746	A	G	A	C	A	T	A	GA	C	A	6
J950285-001	-0.1064	G	G	A	T	A	T	G	A	T	G	6
J950285-002	-0.2026	G	G	A	C	A	T	G	A	TC	G	5
J950289-001	-0.01019	G	A	A	C	G	T	A	A	C	A	4
J950297-003	-0.6836	G	A	A	C	G	C	A	G	C	A	2
J950297-004	-0.1064	G	A	A	C	A	CT	A	G	C	G	2
J950297-005	-0.1064	G	A	A	T	A	CT	A	A	C	A	5
J950298-006	0.08601	G	A	A	T	G	CT	A	G	C	G	2
J950315-001	0.08601	G	A	C	T	AG	T	A	A	C	A	6
J950346-01	0.1822	A	AG	A	C	A	T	A	A	C	A	6
J950370-02	0.4708	G	AG	A	C	A	C	A	A	T	A	3
J950409-10-2	-0.2988	G	A	A	C	G	T	A	G	C	G	2
J950409-10-3	-0.9723	G	A	A	T	G	T	A	G	TC	A	3
J950409-10-4	-0.4912	G	AG	A	C	G	T	AG	A	C	GA	3
J950409-10-5	-0.6836	G	A	A	C	G	T	A	G	C	G	2
J950411-02	-0.8761	G	A	A	T	G	T	A	G	C	G	3
J950411-03	-0.4912	G	G	A	C	A	C	A	A	T	A	4
J950411-05	-0.5874	G	AG	C	T	G	T	A	G	T	G	3
J950412-01	0.1822	G	G	C	T	A	T	A	G	T	A	6
J960670-1	0.5671	G	A	A	T	G	C	A	A	C	A	4
J960678-5	0.9519	A	G	A	C	G	T	A	A	C	A	6
J960793-1	0.8557	A	A	A	T	A	T	A	A	C	A	7
J960793-3	1.3367	A	A	A	T	A	T	A	A	C	A	7
J960793-4	1.1443	A	A	A	T	A	T	A	A	C	A	7
J960794-2	0.6633	A	A	A	C	A	T	A	A	C	A	6
J960805-2	0.6633	A	A	A	T	G	T	A	A	C	A	6
J960805-4	-0.1111	A	A	A	T	G	T	A	A	C	A	6
J961024-1	0.6633	G	G	C	T	A	T	A	A	TC	G	6
J961024-2	-0.01019	G	G	C	T	A	T	A	A	TC	G	6
J961042-2	0.08601	G	A	A	T	A	T	A	G	C	A	5
J961101-1	0.2803	G	G	A	T	G	T	A	A	C	G	5
J961167-1	-0.2988	A	A	A	T	G	T	AG	GA	C	G	4
J961273-1	0.6633	G	A	A	C	A	T	A	A	C	A	5
J970041-5	0.1822	G	A	A	T	G	T	A	GA	C	G	3
J970055-4	0.8557	A	G	A	T	A	T	G	A	C	A	9
J970057-1	1.3367	A	G	A	T	A	T	G	A	C	A	9
J970057-2	1.1443	A	G	A	C	A	T	G	A	C	A	8
J970057-3	0.8557	A	G	A	CT	A	T	G	A	C	A	8
J970057-5	0.9519	A	G	A	T	A	T	G	A	C	A	9
J970057-9	0.4708	G	G	A	T	G	T	G	G	C	G	5
J970062-6	0.4708	A	G	A	C	A	T	G	A	C	A	8
J970067-1	0.3746	A	G	A	C	A	T	G	A	C	A	8
J970067-9	0.9519	A	G	A	C	A	T	G	A	C	A	8
J970092-3	0.3746	A	A	A	T	A	T	A	G	C	A	6
J970157-2	0.2784	A	G	A	C	A	C	G	G	T	G	4
J970284-2	0.6633	G	A	C	T	G	T	A	A	C	G	5
J970536-1	0.08601	A	G	A	C	G	T	G	G	C	A	6
J970611-1	-0.395	A	G	A	C	A	T	A	A	C	A	7
J970812-6	0.08601	A	G	A	C	A	T	G	A	TC	A	7
J970984-2	-0.2988	G	A	A	T	G	T	A	G	C	A	4
J971058-2	-0.2988	A	G	A	C	A	T	A	G	T	G	4
J971186-1	0.08601	A	A	A	C	A	T	G	A	C	A	7
J971221-1	1.0481	A	A	A	C	A	T	G	A	C	A	7
J971236-1	1.1443	A	A	A	C	A	T	G	A	C	A	7
J971249-1	0.5671	A	A	A	C	A	T	G	A	C	A	7
J980032-3	-0.8761	G	AG	A	C	G	T	A	GA	C	A	3
J980032-5	0.4708	G	AG	AC	C	G	T	A	G	C	A	3
J980042-1	0.3746	A	A	A	C	A	T	G	G	C	A	6
J980042-2	0.3746	G	A	A	C	A	T	G	A	C	A	6
J980407-1	-0.1064	G	A	A	T	G	T	A	GA	C	GA	3
J980408-2	0.4708	G	A	A	T	G	T	A	G	C	A	4
J980409-3	0.2784	G	A	A	T	G	T	A	G	C	G	3
J980498-4	0.1822	A	G	AC	C	A	T	A	A	T	G	5
J981358-2	0.08601	G	A	A	T	G	T	A	G	C	A	4
J98407-1	0.08601	G	A	A	T	G	T	A	G	C	G	3
J98408-2	-0.2026	G	A	A	T	G	T	A	GA	C	A	4
J98C0002	0.1822	G	A	A	T	G	T	A	G	C	G	3
JSDM034	-0.6836	G	A	A	T	G	T	A	G	C	G	3
JSDM036	-0.1064	G	A	A	T	G	T	A	G	C	A	4
LAMBERTCF	-0.4912	G	A	A	C	A	CT	A	G	T	A	2
LEWJAIN	0.2784	G	A	A	C	A	T	A	G	C	A	4
MADSEN	-0.2988	G	A	A	T	G	T	A	G	C	A	4
MARY	-0.01019	G	A	A	T	G	T	A	GA	C	GA	3
MASAMI	0.1822	G	A	A	T	G	T	A	A	C	A	5
MOHLER	-0.01019	G	A	A	C	G	T	A	G	C	G	2
MORO	0.7595	G	G	C	T	AG	T	G	G	T	G	5
N92163-1	0.5671	G	A	A	T	G	T	A	G	C	G	3
N92172-7	0.9519	GA	G	A	C	A	T	A	G	TC	A	4
OR2010239	-0.6836	G	A	A	T	G	T	A	G	T	G	2
OR2020787	-0.01019	G	A	A	C	G	C	A	G	C	G	1
OR2030238	-0.01019	G	A	A	T	A	C	A	G	C	G	3
OR2030239	-0.01019	G	A	A	T	A	C	A	G	C	G	3
OR2030411	-1.3571	GA	A	A	T	G	T	A	A	C	GA	4
OR2030554	-0.2026	GA	A	A	T	G	CT	AG	G	C	G	2
OR2040728	-0.7799	G	A	A	T	G	T	AG	G	C	G	3
OR2050293	-0.395	G	A	A	T	G	C	A	G	C	A	3
OR2050299	-0.7799	G	A	A	C	G	CT	A	G	C	G	1
OR2050301	-1.1647	G	A	A	C	G	T	A	G	C	G	2
OR2050853	-0.395	G	G	A	T	A	C	A	A	C	A	6
OR2050910	-0.7799	G	A	A	C	G	C	A	G	C	G	1
OR2050913	-0.395	G	AG	A	C	G	CT	A	A	C	G	2
OR2050914	-0.2988	G	A	A	C	G	CT	A	G	C	A	2
OR2060323	-0.1064	G	A	A	C	G	C	A	G	C	A	2
OR2060324	-0.6836	G	A	A	C	G	CT	A	G	C	A	2
OR2060395	-0.5874	G	A	A	T	G	T	A	G	C	A	4
OR2060431	-0.01019	A	A	A	T	G	C	A	G	C	G	3
OR2060926	-0.4912	G	A	A	C	G	C	A	G	C	G	1
OR2070011	-0.01019	GA	G	A	T	G	T	A	G	C	A	5
OR2070385	-0.2988	G	A	A	T	G	C	A	G	C	A	3
OR2070453	-0.3584	G	A	A	T	G	T	A	G	C	A	4
OR2070608	-0.6836	G	A	A	C	G	C	A	G	C	G	1
OR2070870	-0.5874	G	A	A	C	A	T	A	G	C	A	4
OR2071029	-0.8761	G	A	A	T	G	T	A	G	C	A	4
OR2071071	-0.8761	G	A	A	T	G	T	A	G	C	G	3
OR2071073	-0.4912	G	A	A	T	G	T	A	G	C	A	4
OR2071628	-0.2988	G	A	A	T	G	T	A	G	C	G	3
OR2071681	-0.7799	G	A	A	T	G	CT	A	G	C	G	2
OR208047P94	-0.1064	G	A	A	C	A	T	A	G	C	A	4
OR2080641	-0.1064	A	A	A	T	G	CT	A	G	C	A	4
OR9900553	-0.7799	G	G	A	C	G	T	A	G	C	G	3
OR9901619	-0.2988	G	A	A	T	G	T	A	G	C	A	4
ORCF101	-0.9723	G	A	A	C	A	C	A	G	C	G	2
ORCF102	-0.4912	G	A	A	T	G	C	A	A	C	A	4
ORCF103	0.2784	G	G	A	C	A	T	A	A	C	GA	5
ORF2267-03	-0.01019	G	G	A	C	A	C	A	A	T	A	4
ORH010083	-0.2026	A	G	A	C	A	T	A	G	C	G	5
ORH010837	-0.4912	G	G	A	C	G	C	A	A	C	G	3
ORH010918	-1.0685	G	G	A	T	A	C	A	A	C	G	5
ORI2060306	-1.2609	G	A	A	T	A	C	A	G	C	G	3
ORI2101835	-0.01019	G	G	A	T	G	C	A	G	C	A	4
ORI2101839	-0.1064	G	A	A	T	G	CT	A	G	C	A	3
ORSS1757	-0.395	G	A	A	T	G	T	A	G	C	G	3
SALUTE	-0.4912	G	A	A	C	A	C	A	G	T	A	2
SIMON	-0.5874	G	G	A	T	G	T	A	G	C	G	4
SKILES	-0.2026	A	G	A	C	A	T	A	G	C	G	5
SSD01089	0.8557	A	G	A	C	A	T	A	G	C	A	6
SSD01096	0.6633	A	G	A	C	A	T	A	G	C	A	6
SSD02046	0.08601	G	A	A	T	G	T	A	G	C	G	3
SSD02047	0.1822	G	A	A	T	G	T	A	G	C	G	3
SSD02053	-0.2026	G	A	A	T	G	T	A	G	C	G	3
SSD02065	-0.2026	G	A	A	T	G	T	A	G	C	G	3
SSD02069	-0.395	G	A	A	T	G	T	A	G	C	G	3
SSD02071	-0.2026	G	A	A	T	G	T	A	G	C	G	3
SSD02072	0.6633	G	A	A	T	G	T	A	GA	C	G	3
SSD060015	0.5671	A	A	A	T	G	CT	A	A	C	A	5
SSD060040	0.4708	GA	A	A	T	G	CT	A	A	C	A	4
SSD060061	0.2784	GA	A	A	C	G	CT	A	A	C	A	3
SSD060252	0.2784	G	A	A	C	G	T	A	A	C	G	3
SSD060256	0.3746	GA	A	A	C	G	T	A	A	C	A	4
SSD060443	-0.2026	A	A	A	T	G	T	A	A	C	A	6
SSD060530	0.5671	A	A	A	C	A	T	A	A	C	A	6
SSD060535	0.6633	G	A	A	C	A	T	A	G	C	A	4
STEPHENS	-0.8761	G	A	A	C	G	C	A	G	C	G	1
TUBBS	-0.4912	G	A	A	T	G	C	A	G	C	A	3
TUBBS06	0.7595	GA	A	A	T	G	C	A	G	C	A	3
V/W-29	-0.01019	G	A	A	C	A	C	A	G	C	G	2
V/W-30	-0.395	G	A	A	T	A	C	A	G	C	G	3
V/W-32	0.08601	G	A	A	C	A	C	A	GA	C	G	2
V/W-46	-0.6836	G	A	A	C	A	T	A	G	C	G	3
V/W-51	-0.5874	G	A	A	C	A	T	A	G	C	G	3
V096408	-0.01019	A	A	A	C	A	C	A	G	C	G	3
VO95010	0.7595	GA	G	A	C	A	CT	A	A	C	A	5
VO96406	-0.2026	A	A	A	C	A	CT	A	A	C	G	4
VO96410	-0.01019	A	A	A	C	A	C	A	G	C	G	3
VO96511	0.08601	GA	A	A	C	A	C	A	A	C	A	4
WA7918	-0.01019	A	A	A	C	A	C	A	G	C	G	3
WA7932	0.2784	A	A	A	C	A	C	A	G	C	G	3
WA7933	0.08601	G	A	A	T	G	T	A	G	C	G	3
WA7934	0.5671	GA	AG	A	T	AG	T	A	GA	C	A	4
WA7935	0.1822	A	G	A	C	A	T	G	A	C	A	8
WA7935C	0.1822	A	G	A	C	A	T	AG	A	C	A	7
WA7965	-0.2988	G	A	A	T	G	T	A	G	C	G	3
WA7970	-0.5874	G	A	A	T	G	T	A	G	C	G	3
WA7971	0.1822	G	G	A	C	A	C	A	A	T	A	4
WA8000	0.2784	G	A	A	T	G	T	A	GA	C	G	3
WA8020	0.4708	A	A	A	T	A	T	A	A	C	A	7
WA8021	-0.395	G	A	A	T	G	T	A	G	C	G	3
WA8063	-1.3571	G	A	A	CT	A	T	A	G	C	G	3
WA8064	-1.0685	G	A	A	C	A	T	A	G	C	G	3
WA8064-55	-0.1064	A	A	A	C	G	T	A	A	C	G	4
WA8065	-0.2988	A	A	A	C	A	C	A	G	C	G	3
WA8066	-0.2988	A	A	A	C	G	T	A	A	C	G	4
WA8092	0.4708	A	G	A	T	A	T	G	A	C	A	9
WA8093	-0.2026	A	A	A	C	A	C	A	G	C	G	3
WA8094	0.6633	A	AG	A	C	AG	T	AG	A	C	A	5
WA8114	-0.9723	G	A	A	C	A	T	A	G	C	G	3
WA8115	-0.4912	A	A	A	C	A	CT	A	G	C	G	3
WA8116	-0.2026	A	AG	A	C	G	T	AG	A	C	G	4
WA8117	-0.2026	A	AG	A	C	A	T	A	A	C	G	5
WA8134	-0.6836	G	G	A	C	G	T	A	G	C	A	4
WA8137	-0.2026	A	A	A	C	G	T	A	A	C	G	4
WA8138	-0.01019	A	AG	A	C	A	T	A	A	C	G	5
WA8142	-0.2026	G	AG	A	T	G	T	A	G	C	G	3
WA8143	0.4708	A	G	A	C	A	T	A	G	C	A	6
WA8144	0.08601	A	G	A	C	A	T	G	A	C	A	8
WA8151	0.5671	A	A	A	T	G	T	A	A	C	G	5
WA8152	0.4708	A	G	A	C	A	CT	G	G	C	A	6
WA8153	-0.2026	G	A	A	C	A	T	A	G	C	G	3
WA8154	0.3746	G	A	A	C	A	T	A	G	C	G	3
WEATHERFORD	-0.2026	G	AG	A	T	G	CT	A	G	C	A	3
X00270-6L	0.08601	G	G	A	T	G	T	A	G	C	A	5
X00277-4L	-0.1064	G	A	A	C	G	T	A	G	C	G	2
X00290-4L	0.5671	A	G	A	C	A	T	A	A	C	G	6
X00295-14C	-0.2026	G	A	C	T	A	T	A	GA	T	G	4
X010251-3C	0.7595	G	G	C	T	A	T	A	A	C	G	7
X010251-4C	0.2784	G	G	C	T	A	T	A	G	C	G	6
X010251-5C	0.4708	G	G	C	T	A	T	A	G	C	G	6
X010251-7C	0.3746	G	G	C	T	A	T	A	G	T	G	5
X010253-4C	0.08601	G	G	C	T	A	T	A	A	T	G	6
X010259-2C	0.1822	G	A	A	C	A	T	A	A	T	G	3
X010260-6C	0.6633	G	A	A	T	A	T	A	A	T	G	4
X010262-1C	0.5671	A	A	A	T	A	T	AG	A	T	G	5
X010262-5C	0.9519	G	A	A	T	A	T	G	A	C	G	6
X010263-3C	0.8557	G	A	A	T	A	T	AG	A	T	G	4
X010264-1C	0.3746	G	A	A	T	A	T	A	A	T	G	4
X010283-3C	-0.5874	G	A	C	T	A	T	A	G	T	G	4
X010283-5C	-0.4912	G	A	C	T	A	T	A	G	T	G	4
X010290-2C	0.1822	G	G	A	T	A	T	A	G	C	A	6
X010290-8C	0.1822	G	G	A	T	A	T	A	G	C	A	6
X010291-4C	0.5671	A	G	A	T	A	T	A	G	C	G	6
X010293-6C	-0.1064	G	G	A	C	A	T	A	A	T	G	4
X010298-5C	-0.395	G	G	A	C	A	T	A	G	T	G	3
X010300-2C	-0.2988	G	AG	A	T	A	T	G	G	T	G	4
X010302-1C	-0.1064	G	A	A	C	A	T	A	G	T	G	2
X010302-2C	-0.2026	G	G	A	T	A	T	A	G	T	G	4
X010302-5C	-0.1064	G	G	A	C	A	T	A	G	T	G	3
X010455-2C	-0.2026	G	G	A	C	A	T	A	G	T	G	3
X010463-4C	-0.395	G	A	C	T	G	T	A	G	C	G	4
X010463-9C	-0.01019	G	A	C	T	G	T	A	G	C	G	4
X010662-2C	-0.2026	G	A	C	T	A	T	A	A	C	A	7
X010669-2C	-0.2026	G	A	C	T	A	T	A	A	C	G	6
X010678-8C	-0.1064	G	A	A	T	G	T	A	G	C	A	4
X010679-1C	0.3746	G	A	A	T	A	T	A	G	T	G	3
X010679-3C	-0.5874	G	A	A	T	A	T	A	G	T	G	3
X010704-3C	-0.7799	G	G	A	C	G	T	A	G	C	G	3
X010726-2C	-0.2026	G	A	A	C	G	T	A	A	C	G	3
X010729-1L	-0.2026	A	A	A	C	A	T	A	A	C	G	5
X010730-6L	-0.01019	G	G	A	C	G	T	A	G	C	G	3
X010741-3C	-0.2988	G	G	A	T	A	T	A	G	T	G	4
X010742-2C	-0.1064	G	A	A	T	A	T	A	G	T	G	3
X010744-3C	-0.2988	G	G	A	T	A	T	A	G	T	G	4
X010746-4C	-0.1064	G	G	C	T	A	T	A	G	T	G	5
X010746-5C	-0.2026	G	AG	C	T	A	T	A	G	T	G	4
X010746-8C	0.1822	G	G	A	T	A	T	A	G	T	G	4
X010780-5C	-0.1064	G	G	A	T	A	T	A	GA	C	GA	5
X010782-3C	-0.01019	G	G	A	T	A	T	A	G	T	G	4
X010787-1C	-0.4912	A	G	A	T	G	T	A	G	C	G	5
X010817-4L	-0.4912	G	G	A	T	A	T	A	G	T	G	4
X010830-2C	-0.01019	G	A	A	T	G	T	A	G	C	G	3
X950424-1	0.1822	G	G	A	T	A	T	G	A	T	G	6
X950424-2	0.4708	G	AG	A	T	A	T	G	G	T	G	4
X950851	0.5671	GA	A	A	T	AG	T	A	A	C	A	5
X960011C	0.08601	G	AG	A	T	A	CT	A	A	T	G	3
X9602044-2C	0.2784	G	G	A	T	A	T	G	G	T	A	6
X960407	0.08601	G	A	A	T	A	T	A	G	T	G	3
X960409-1	0.3746	G	G	C	T	A	T	A	G	C	G	6
X960411-1	0.1822	G	G	A	T	A	T	A	G	C	G	5
X960411-2	0.1822	G	G	A	T	G	T	A	A	C	G	5
X960414-1	0.5671	G	G	A	T	A	T	A	G	C	G	5
X960414-2	0.6633	G	G	A	T	A	T	A	G	C	G	5
X960418	0.2784	G	G	A	T	A	T	A	G	C	G	5
X960427	-0.2988	G	G	A	T	G	T	A	G	T	G	3
X960491	-0.1064	G	AG	A	T	G	CT	A	G	C	G	2
X960499	-0.2988	G	G	A	T	A	T	A	GA	C	G	5
X960503	0.08601	G	G	A	T	A	T	A	A	T	G	5
X960538C	-0.1064	G	G	C	C	A	T	A	G	T	G	4
X960731	-0.395	G	G	C	C	A	T	AG	G	T	G	4
X960749-1	0.5671	G	G	A	T	A	T	A	G	C	G	5
X960749-2	0.1822	G	A	A	T	A	T	A	G	C	G	4
X96312t313C	0.08601	G	G	A	T	A	T	A	A	T	G	5
X970005-1	0.4708	G	G	A	T	A	T	A	A	T	G	5
X970005-2	0.2784	G	G	A	T	A	T	A	G	T	G	4
X970008-2	0.1822	G	G	A	T	A	T	A	G	TC	G	4
X970008-3	0.2784	G	G	A	T	A	T	A	G	C	G	5
X970012-3C	0.8557	GA	G	A	T	G	T	A	G	T	G	3
X970024-4	0.4708	G	G	C	T	A	T	A	A	T	G	6
X970026-1	0.4708	G	G	A	T	A	T	A	G	T	A	5
X970027-1	0.8557	G	AG	C	T	G	T	A	G	T	G	3
X970027-2	-0.4912	G	A	A	T	G	T	A	G	T	G	2
X970038-1C	-0.01019	G	G	A	T	A	T	A	A	T	G	5
X970038-2C	0.2784	G	G	A	T	A	T	A	A	T	G	5
X970042-2C	-0.1064	A	G	A	T	G	T	A	G	T	A	5
X970042C	0.08601	A	G	A	T	G	T	A	G	T	A	5
X970048-1C	-0.2988	G	G	A	T	A	T	A	G	T	A	5
X970048-2C	-0.2026	G	G	A	T	A	T	A	G	T	A	5
X970048C	-0.2988	G	G	A	T	A	T	A	G	T	A	5
X970054-2	-0.01019	G	G	C	T	A	T	A	G	T	G	5
X970055-2	-0.2026	G	G	A	T	A	T	A	A	T	G	5
X970057-2	-0.2026	G	G	A	T	G	T	A	GA	T	G	3
X970057-4	-0.2988	G	G	A	T	G	T	A	G	T	G	3
X970071-1	0.08601	A	G	A	T	A	T	A	G	T	G	5
X970108-1C	0.08601	G	G	C	T	A	T	A	A	T	G	6
X970108-2	0.2784	G	G	C	T	A	T	A	A	T	G	6
X970108-2C	0.1822	G	G	C	T	A	T	A	A	T	G	6
X970108-3	0.2784	G	G	C	T	A	T	A	A	T	G	6
X970149-1L	0.2463	A	A	A	T	G	T	A	A	C	A	6
X970149-7L	-0.395	A	A	A	C	A	T	A	G	C	A	5
X970161-2L	-0.01019	G	A	C	T	G	T	A	A	T	A	5
X970163-3	-0.5874	A	G	A	C	G	T	A	A	T	G	4
X970167-1	-0.6836	A	AG	AC	T	A	T	A	G	T	G	4
X970167-2L	0.2784	A	G	A	C	A	T	G	A	C	A	8
X970167-3L	-0.7799	G	G	A	C	A	T	A	A	C	A	6
X970167-5L	-0.5874	G	G	A	C	A	T	A	A	C	A	6
X970168-1L	-0.8761	A	A	A	T	G	T	A	A	C	G	5
X970168-2L	-0.2026	A	A	A	C	G	T	A	A	C	G	4
X970170-2	-0.2026	A	A	A	C	A	T	A	A	C	G	5
X970170L	-0.395	A	G	C	T	A	T	A	A	C	G	8
X970175-1L	-0.7799	G	A	A	C	G	C	A	A	T	G	1
X970175-3C	-0.2988	G	A	A	C	G	C	A	A	T	G	1
X970175-4C	-0.4912	G	A	A	T	G	T	A	G	C	G	3
X970175-6C	-0.6836	G	A	A	T	G	T	A	G	C	G	3
X970185-1C	-0.1064	A	G	C	C	A	T	A	A	T	G	6
X970229	-0.01019	G	A	C	T	A	T	A	G	C	G	5
X970235	-0.6836	A	G	A	T	G	T	A	G	C	A	6
X970281	-0.3584	G	AG	A	T	A	T	A	G	T	A	4
X980302-8C	-0.2026	G	A	A	T	A	T	A	G	T	G	3
X980336-5L	-0.4912	A	A	A	C	G	T	A	A	C	A	5
X980421-1C	-0.8761	G	G	A	T	A	T	A	G	T	A	5
X980434-1L	-0.1064	G	A	A	T	A	T	A	G	C	G	4
X980437-3L	-0.6836	G	A	A	T	A	T	A	G	T	G	3
X980451-4C	-0.7799	G	A	C	C	G	T	A	G	T	G	2
X990070-C	0.4708	G	G	C	T	A	T	A	G	T	G	5
XERPHA	-0.6836	G	G	A	C	G	T	A	A	T	A	4
